# Supplementary material for: The General Movement Optimality Score-Revised (GMOS-R) with Socioeconomically Stratified Percentile Ranks
Source: MDPI journal article supplement (doi:10.3390/jcm13082260), 2024-04-13
Supplement: s1 [file s1]

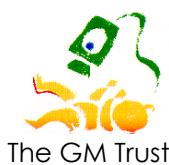

# The General Movements Optimality Score-Revised (GMOS-R)

Detailed Assessment of General Movements during Preterm and Term Age:

Christa Einspieler and Arie Bos for the GM Trust, 2024

The GM Trust

|                                 |                                                                                                                                                                  |                                                                                                       |                                                                                                                                                                                               |
|---------------------------------|------------------------------------------------------------------------------------------------------------------------------------------------------------------|-------------------------------------------------------------------------------------------------------|-----------------------------------------------------------------------------------------------------------------------------------------------------------------------------------------------|
| Name                            |                                                                                                                                                                  | Date of Birth                                                                                         |                                                                                                                                                                                               |
| Recording Date                  |                                                                                                                                                                  | Postmenstrual Age Weeks                                                                               |                                                                                                                                                                                               |
| Behavioural State (Coincidence) |                                                                                                                                                                  | <input type="checkbox"/> State 2 (Active Sleep) <input type="checkbox"/> State 4 (Active Wakefulness) |                                                                                                                                                                                               |
| GM CATEGORY                     | <input type="checkbox"/> Normal<br><input type="checkbox"/> Poor Repertoire<br><input type="checkbox"/> Cramped-Synchronised<br><input type="checkbox"/> Chaotic | SEQUENCE                                                                                              | <input type="checkbox"/> 2 variable<br><input type="checkbox"/> 1 monotonous and/or incomplete sequence<br><input type="checkbox"/> 0 synchronised<br><input type="checkbox"/> 0 disorganised |

## Detailed Scoring:

|                                                                                                                                                                         |                                                                                                                                                                                                |
|-------------------------------------------------------------------------------------------------------------------------------------------------------------------------|------------------------------------------------------------------------------------------------------------------------------------------------------------------------------------------------|
| NECK                                                                                                                                                                    | TRUNK                                                                                                                                                                                          |
| <input type="checkbox"/> 2 <b>variably involved in the sequence</b><br><input type="checkbox"/> 1 isolated movements<br><input type="checkbox"/> 0 does not move at all | <input type="checkbox"/> 2 <b>fluent and elegant rotations</b><br><input type="checkbox"/> 1 repetitive or few rotations<br><input type="checkbox"/> 0 almost no rotations or en bloc movement |

|                              |                                                                                                                                                                                                     |                                                                                                                                                                                                     |
|------------------------------|-----------------------------------------------------------------------------------------------------------------------------------------------------------------------------------------------------|-----------------------------------------------------------------------------------------------------------------------------------------------------------------------------------------------------|
|                              | UPPER EXTREMITIES                                                                                                                                                                                   | LOWER EXTREMITIES                                                                                                                                                                                   |
| Amplitude                    | <input type="checkbox"/> 2 <b>variable</b><br><input type="checkbox"/> 1 monotonous<br><input type="checkbox"/> 0 almost always small<br><input type="checkbox"/> 0 almost always large             | <input type="checkbox"/> 2 <b>variable</b><br><input type="checkbox"/> 1 monotonous<br><input type="checkbox"/> 0 almost always small<br><input type="checkbox"/> 0 almost always large             |
| Speed                        | <input type="checkbox"/> 2 <b>variable</b><br><input type="checkbox"/> 1 monotonous<br><input type="checkbox"/> 0 almost always slow<br><input type="checkbox"/> 0 almost always fast               | <input type="checkbox"/> 2 <b>variable</b><br><input type="checkbox"/> 1 monotonous<br><input type="checkbox"/> 0 almost always slow<br><input type="checkbox"/> 0 almost always fast               |
| Spatial range                | <input type="checkbox"/> 2 <b>full age-specific space used</b><br><input type="checkbox"/> 1 limited space<br><input type="checkbox"/> 0 in one plane only, e.g. only on surface                    | <input type="checkbox"/> 2 <b>full age-specific space used</b><br><input type="checkbox"/> 1 limited space<br><input type="checkbox"/> 0 in one plane only, e.g. lifted-released                    |
| Proximal rotatory components | <input type="checkbox"/> 2 <b>present, variable, fluent and elegant</b><br><input type="checkbox"/> 1 present but monotonous<br><input type="checkbox"/> 0 almost no rotations                      | <input type="checkbox"/> 2 <b>present, variable, fluent and elegant</b><br><input type="checkbox"/> 1 present but monotonous<br><input type="checkbox"/> 0 almost no rotations                      |
| Distal rotatory components   | <input type="checkbox"/> 2 <b>present, variable, fluent and elegant</b><br><input type="checkbox"/> 1 present but monotonous<br><input type="checkbox"/> 0 almost no rotations                      | <input type="checkbox"/> 2 <b>present, variable, fluent and elegant</b><br><input type="checkbox"/> 1 present but monotonous<br><input type="checkbox"/> 0 almost no rotations                      |
| Beginning                    | <input type="checkbox"/> 2 <b>smooth and gradually increasing</b><br><input type="checkbox"/> 1 minimal fluctuation<br><input type="checkbox"/> 0 almost always abrupt                              | <input type="checkbox"/> 2 <b>smooth and gradually increasing</b><br><input type="checkbox"/> 1 minimal fluctuation<br><input type="checkbox"/> 0 almost always abrupt                              |
| End                          | <input type="checkbox"/> 2 <b>smooth and gradually decreasing</b><br><input type="checkbox"/> 1 minimal fluctuation<br><input type="checkbox"/> 0 almost always abrupt                              | <input type="checkbox"/> 2 <b>smooth and gradually decreasing</b><br><input type="checkbox"/> 1 minimal fluctuation<br><input type="checkbox"/> 0 almost always abrupt                              |
| Stiffness                    | <input type="checkbox"/> 2 <b>movements are smooth without stiffness</b><br><input type="checkbox"/> 1 stiffness occasionally present<br><input type="checkbox"/> 0 stiffness almost always present | <input type="checkbox"/> 2 <b>movements are smooth without stiffness</b><br><input type="checkbox"/> 1 stiffness occasionally present<br><input type="checkbox"/> 0 stiffness almost always present |

|                                     |  |
|-------------------------------------|--|
| Subscore SEQUENCE (0 – 2)           |  |
| Sub Subscore NECK and TRUNK (0 – 4) |  |
| Subscore UPPER EXTREMITIES (0 – 16) |  |
| Subscore LOWER EXTREMITIES (0 – 16) |  |
| Total GMOS-R (0-38)                 |  |

|                                                                    |  |
|--------------------------------------------------------------------|--|
| <input type="checkbox"/> LMIC/UMIC<br><input type="checkbox"/> HIC |  |
| Age-Specific Centile Rank within GM Category                       |  |
